# Supplementary material
Source: publisher figshare collection journal article supplement (https://frontiersin.figshare.com/ndownloader/files/34350407)
Supplement: Supplementary file 1 [file 34350407]

a) Hexahedron coarse mesh:

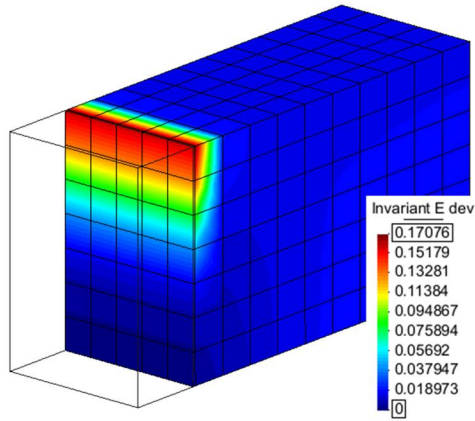

b) Tetrahedron structured-coarse mesh:

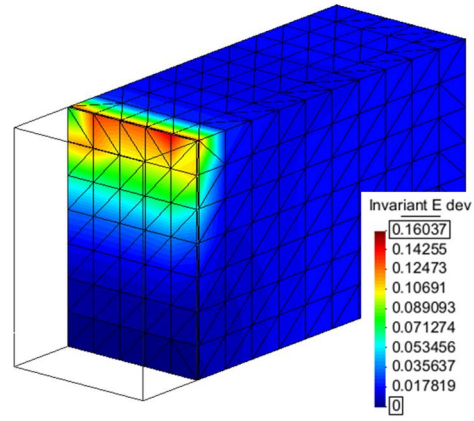

c) Tetrahedron structured-medium mesh:

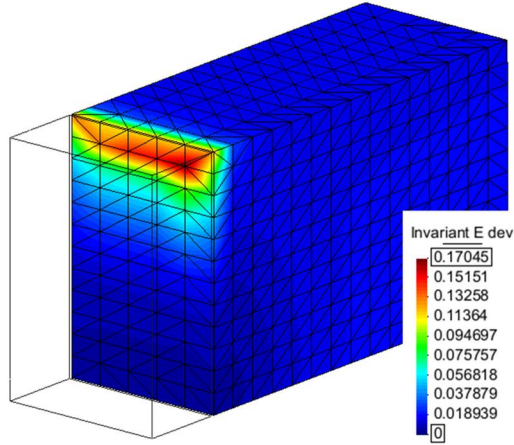

d) Tetrahedron unstructured mesh:

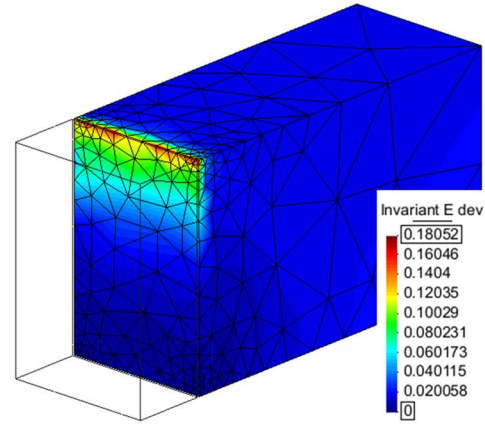

**Figure S9:** Total shear strains results for  $q = 100$  kPa-surcharge at top of soil zone: (a) hexahedron structured-coarse mesh, (b) tetrahedron structured-coarse mesh, (c) tetrahedron structured-medium mesh, and (d) tetrahedron unstructured irregular-mesh. Cases with  $t_i = 0.018$  m and  $R_i = 0.8$ .
